# Supplementary material for: Hyper-Methylated Loci Persisting from Sessile Serrated Polyps to Serrated Cancers
Source: MDPI journal article supplement (doi:10.3390/ijms18030535), 2017-03-02
Supplement: s1 [file s1]

**Supplemental Table 1. CpG loci are hyper-methylated in SSA/Pa on both the left and right anatomic sides of the bowel.**

| Probe ID   | Gene             | Feature          | SSA Left | SSA Right | logFC   | BH-corrected |
|------------|------------------|------------------|----------|-----------|---------|--------------|
|            |                  |                  | mean     | mean      |         | P-value      |
| cg00803088 | <i>RET</i>       | Body - island    | 0.49     | 0.51      | 0.019   | 0.96         |
| cg02120582 | <i>PDGFD</i>     | 5'UTR - island   | 0.49     | 0.45      | -0.033  | 0.89         |
| cg02485200 | <i>JAM2</i>      | 1stExon - island | 0.38     | 0.44      | 0.063   | 0.88         |
| cg03394150 | <i>GSG1L</i>     | Body - island    | 0.50     | 0.51      | 0.0049  | 0.99         |
| cg03401096 | <i>MIR4493</i>   | IGR - island     | 0.54     | 0.52      | -0.023  | 0.88         |
| cg03735888 | <i>ZNF132</i>    | TSS200 - island  | 0.45     | 0.40      | -0.047  | 0.92         |
| cg04657205 | <i>MIR1233-1</i> | IGR - island     | 0.38     | 0.47      | 0.087   | 0.88         |
| cg07155336 | <i>NTNG1</i>     | 5'UTR - island   | 0.40     | 0.52      | 0.12    | 0.81         |
| cg09528825 | <i>GSG1L</i>     | Body - island    | 0.49     | 0.49      | -0.0033 | 0.99         |
| cg14553600 | <i>JAM2</i>      | 1stExon - island | 0.41     | 0.46      | 0.051   | 0.89         |
| cg18456523 | <i>MCIDAS</i>    | IGR - island     | 0.49     | 0.56      | 0.076   | 0.88         |
| cg20680720 | <i>ZNF568</i>    | TSS200 - island  | 0.36     | 0.43      | 0.067   | 0.90         |
| cg21101720 | <i>ANKRD13B</i>  | Body - island    | 0.55     | 0.53      | -0.021  | 0.97         |
| cg22830113 | <i>BIN1</i>      | IGR - island     | 0.41     | 0.55      | 0.14    | 0.78         |
| cg24979348 | <i>RERG</i>      | 5'UTR - island   | 0.35     | 0.40      | 0.050   | 0.93         |

Benjamini-Hochberg (BH), difference in log odds of methylation (logFC)

**Supplemental Table 2. Dysregulated CpG loci differ by CIMP status in The Cancer Genome Atlas (TCGA) data.**

| Probe ID   | Gene             | P-value        |                   |
|------------|------------------|----------------|-------------------|
|            |                  | CIMPL vs. CIMP | non-CIMP vs. CIMP |
| cg00803088 | <i>RET</i>       | 0.0301         | < 2e-16           |
| cg02120582 | <i>PDGFD</i>     | 0.00221        | 5.80E-11          |
| cg02485200 | <i>JAM2</i>      | 0.000672       | < 2e-16           |
| cg03394150 | <i>GSG1L</i>     | 0.537          | 9.81E-09          |
| cg03401096 | <i>MIR4493</i>   | 0.004          | 1.72E-08          |
| cg03735888 | <i>ZNF132</i>    | 0.171          | 9.24E-09          |
| cg04657205 | <i>MIR1233-1</i> | 1.30E-13       | < 2e-16           |
| cg07155336 | <i>NTNG1</i>     | 1.20E-05       | < 2e-16           |
| cg09528825 | <i>GSG1L</i>     | 0.436          | 6.94E-09          |
| cg14553600 | <i>JAM2</i>      | 0.00997        | 3.83E-14          |
| cg18456523 | <i>MCIDAS</i>    | 0.000398       | 1.24E-06          |
| cg21101720 | <i>ANKRD13B</i>  | 0.847          | 0.671             |
| cg22830113 | <i>BIN1</i>      | 9.98E-11       | < 2e-16           |
| cg24979348 | <i>RERG</i>      | 6.23E-06       | 9.10E-15          |
