# Supplementary material for: Hyper-Methylated Loci Persisting from Sessile Serrated Polyps to Serrated Cancers
Source: MDPI journal article supplement (doi:10.3390/ijms18030535), 2017-03-02
Supplement: s1 [file s1]

## Supplemental Figure 1.

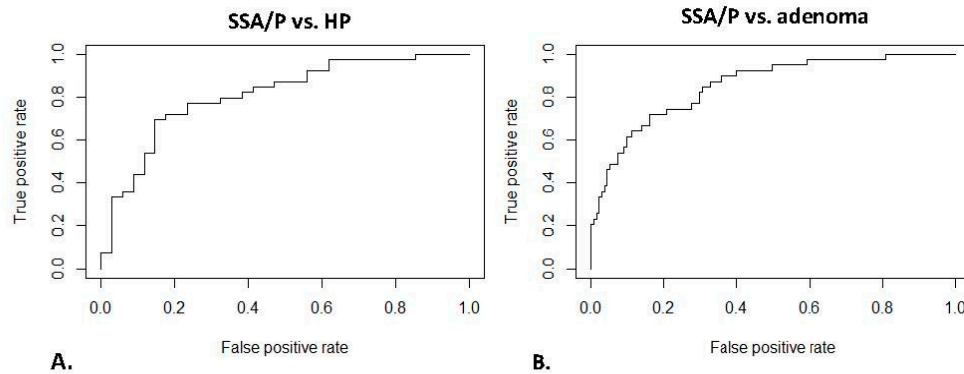

**Supplemental Figure 1.** Hyper-methylated CpGs discriminate SSA/P vs. HP or adenoma. We constructed logistic regression models using data from the NH Colonoscopy Registry containing the methylation level of the 15 hyper-methylated CpG loci as predictors and polyp type as the outcome: (A) SSA/P (n = 39) vs. HPs (n = 34), (B) SSA/P (n = 39) vs. conventional adenoma (n = 135). We assessed the ability of this model to discriminate among polyp types by plotting the true positive rate against the false positive rate at various threshold settings as a receiver operating characteristic (ROC) curve and calculating the area under that curve (AUC).
